# Supplementary material for: Hypercrosslinked Ionic Polymers with High Ionic Content for Efficient Conversion of Carbon Dioxide into Cyclic Carbonates
Source: MDPI journal article supplement (doi:10.3390/catal12010062), 2022-01-06
Supplement: s1 [file s1]

## Supporting Information

# Hypercrosslinked ionic polymers with high ionic content for efficient conversion of carbon dioxide into cyclic carbonates

Xu Liao <sup>1,†</sup>, Baoyou Pei <sup>2,†</sup>, Ruixun Ma <sup>2</sup>, Lingzheng Kong <sup>2</sup>, Xilin Gao <sup>1</sup>, Jiao He <sup>1</sup>, Xiaoyan Luo <sup>1,\*</sup>, Jinqing Lin <sup>1,\*</sup>

<sup>1</sup> College of Materials Science and Engineering, Huaqiao University, Xiamen 361021, China

liaoxu@stu.hqu.edu.cn (X.L.); gaoxilin@stu.hqu.edu.cn (X.G.); hejiao@stu.hqu.edu.cn (J.H.).

<sup>2</sup> College of Chemical Engineering, Huaqiao University, Xiamen 361021, China

pbylt1314@stu.hqu.edu.cn (B.P.); maruixun@foxmail.com (R.M.); konglingzheng@stu.hqu.edu.cn (L.K.)

\* Correspondence: chemistrylxy@163.com (X.L.); linlab@hqu.edu.cn (J.L.).

† These authors contributed equally to this work.

## Supplementary tables

**Table S1.** The effect of mass ratio of allyl chloride/ HCP on specific surface area and chloromethyl content of HCP-CH<sub>2</sub>-Cl-X<sup>a</sup>.

| <sup>a</sup> mass of ratio allyl chloride/ HCP                  | 1.0 | 2.0 | 3.0 | 4.0 | 5.0 | 6.0 | 9.0 |
|-----------------------------------------------------------------|-----|-----|-----|-----|-----|-----|-----|
| Chlorine content <sup>b</sup> (mmol g <sup>-1</sup> )           | 0.2 | 1.2 | 2.0 | 2.5 | 3.1 | 2.5 | 2.3 |
| S <sub>BET</sub> <sup>c</sup> (m <sup>2</sup> g <sup>-1</sup> ) | 910 | 836 | 750 | 650 | 530 | 427 | 333 |

<sup>a</sup> Reaction conditions: mass of ratio H<sub>2</sub>SO<sub>4</sub>/ HCP = 1.5, 50 °C, 24 h.

<sup>b</sup> Chlorine content calculated by Mohr method.

<sup>c</sup> BET surface area.

**Table S2.** The effect of mass ratio of H<sub>2</sub>SO<sub>4</sub>/ HCP on specific surface area and chloromethyl content of HCP-CH<sub>2</sub>-Cl-X<sup>a</sup>.

| <sup>a</sup> mass of ratio H <sub>2</sub> SO <sub>4</sub> / HCP | 0.5 | 1.0 | 1.5 | 2.0 | 2.5 |
|-----------------------------------------------------------------|-----|-----|-----|-----|-----|
| Chlorine content <sup>b</sup> (mmol g <sup>-1</sup> )           | 2.0 | 2.7 | 3.1 | 2.1 | 1.7 |
| S <sub>BET</sub> <sup>c</sup> (m <sup>2</sup> g <sup>-1</sup> ) | 783 | 641 | 530 | 515 | 431 |

<sup>a</sup> Reaction conditions: mass of ratio allyl chloride/ HCP = 5, 50 °C, 24 h.

<sup>b</sup> Chlorine content calculated by Mohr method.

<sup>c</sup> BET surface area.

**Table S3.** The effect of reaction time on specific surface area and chloromethyl content of HCP-CH<sub>2</sub>-Cl-X<sup>a</sup>.

| Reaction time (h)                                               | 8   | 16  | 24  | 32  | 40  |
|-----------------------------------------------------------------|-----|-----|-----|-----|-----|
| Chlorine content <sup>b</sup> (mmol g <sup>-1</sup> )           | 1.5 | 2.6 | 3.1 | 2.9 | 3.0 |
| S <sub>BET</sub> <sup>c</sup> (m <sup>2</sup> g <sup>-1</sup> ) | 755 | 623 | 530 | 380 | 250 |

<sup>a</sup> Reaction conditions: mass of ratio allyl chloride/ HCP = 5, mass of ratio H<sub>2</sub>SO<sub>4</sub>/ HCP=1.5, 50 °C.

<sup>b</sup> Chlorine content calculated by Mohr method.

<sup>c</sup> BET surface area.

**Table S4.** The effect of reaction temperature on specific surface area and chloromethyl content of HCP-CH<sub>2</sub>-Cl-X<sup>a</sup>.

| Temperature (°C) | 30 | 40 | 50 | 60 | 70 |
|------------------|----|----|----|----|----|
|------------------|----|----|----|----|----|

|                                                                  |     |     |     |     |     |
|------------------------------------------------------------------|-----|-----|-----|-----|-----|
| <b>Chlorine content<sup>b</sup> (mmol g<sup>-1</sup>)</b>        | 2.7 | 2.9 | 3.1 | 2.8 | 2.7 |
| <b>S<sub>BET</sub><sup>c</sup> (m<sup>2</sup>g<sup>-1</sup>)</b> | 711 | 635 | 530 | 343 | 320 |

<sup>a</sup> Reaction conditions: mass of ratio allyl chloride/ HCP = 5, mass of ratio H<sub>2</sub>SO<sub>4</sub>/ HCP=1.5, 24 h.

<sup>b</sup> Chlorine content calculated by Mohr method.

<sup>c</sup> BET surface area.

**Table S5.** The synthesis conditions of HCP-CH<sub>2</sub>-Cl-X.

| <b>Sample</b>             | <b>mass ratio of allyl chloride to HCP</b> | <b>mass ratio of H<sub>2</sub>SO<sub>4</sub> to HCP</b> | <b>reaction time (h)</b> | <b>reaction temperature (°C)</b> |
|---------------------------|--------------------------------------------|---------------------------------------------------------|--------------------------|----------------------------------|
| HCP-CH <sub>2</sub> -Cl-1 | 5                                          | 1.5                                                     | 24                       | 50                               |
| HCP-CH <sub>2</sub> -Cl-2 | 5                                          | 0.5                                                     | 24                       | 50                               |
| HCP-CH <sub>2</sub> -Cl-3 | 5                                          | 2.5                                                     | 24                       | 50                               |
| HCP-CH <sub>2</sub> -Cl-4 | 5                                          | 1.5                                                     | 8                        | 50                               |
| HCP-CH <sub>2</sub> -Cl-5 | 5                                          | 1.5                                                     | 40                       | 50                               |
| HCP-CH <sub>2</sub> -Cl-6 | 5                                          | 1.5                                                     | 24                       | 30                               |
| HCP-CH <sub>2</sub> -Cl-7 | 5                                          | 1.5                                                     | 24                       | 70                               |

**Table S6.** Textual properties of [HCP-CH<sub>2</sub>-Im][Cl]-X.

| <b>Sample</b>                   | <b>S<sub>BET</sub><sup>a</sup> (m<sup>2</sup>g<sup>-1</sup>)</b> | <b>V<sub>p</sub><sup>b</sup> (cm<sup>3</sup>g<sup>-1</sup>)</b> | <b>D<sub>total</sub><sup>c</sup> (nm)</b> | <b>IL content<sup>d</sup> (mmol g<sup>-1</sup>)</b> |
|---------------------------------|------------------------------------------------------------------|-----------------------------------------------------------------|-------------------------------------------|-----------------------------------------------------|
| [HCP-CH <sub>2</sub> -Im][Cl]-1 | 385                                                              | 0.332                                                           | 3.445                                     | 2.10                                                |
| [HCP-CH <sub>2</sub> -Im][Cl]-2 | 510                                                              | 0.661                                                           | 5.182                                     | 0.99                                                |
| [HCP-CH <sub>2</sub> -Im][Cl]-3 | 386                                                              | 0.573                                                           | 5.928                                     | 0.48                                                |
| [HCP-CH <sub>2</sub> -Im][Cl]-4 | 503                                                              | 0.721                                                           | 5.730                                     | 0.85                                                |
| [HCP-CH <sub>2</sub> -Im][Cl]-5 | 183                                                              | 0.450                                                           | 9.825                                     | 1.65                                                |
| [HCP-CH <sub>2</sub> -Im][Cl]-6 | 406                                                              | 0.652                                                           | 6.408                                     | 1.81                                                |
| [HCP-CH <sub>2</sub> -Im][Cl]-7 | 295                                                              | 0.414                                                           | 5.601                                     | 1.26                                                |

<sup>a</sup> BET surface area.

<sup>b</sup> Total pore volume.

<sup>c</sup> Average pore size for total pores.

<sup>d</sup> IL content calculated by elemental analysis.

**Table S7.** Activity of porous ionic polymers in the cycloaddition of CO<sub>2</sub> with styrene oxide.

| <b>Catalyst</b>              | <b>t (h)</b> | <b>Tem. (K)</b> | <b>CO<sub>2</sub> (MPa)</b> | <b>Co-catalyst</b> | <b>Yield (%)</b> | <b>Ref.</b> |
|------------------------------|--------------|-----------------|-----------------------------|--------------------|------------------|-------------|
| HPILs-Cl-2                   | 9            | 343             | 0.1                         | TBAB               | 88               | 1           |
| POM3-IM                      | 12           | 393             | 1                           | None               | 89               | 2           |
| PDmBr                        | 12           | 393             | 0.1                         | None               | 91               | 3           |
| CPBr-2                       | 7            | 363             | 2.5                         | None               | 79               | 4           |
| ZnBr <sub>2</sub> @Bpy-PHP-4 | 72           | 373             | 0.1                         | None               | 99               | 5           |
| Zn/POF2                      | 9            | 363             | 0.25                        | TBAB               | 87               | 6           |
| SYSU-Zn@IL2                  | 24           | 353             | 1                           | None               | 80               | 7           |
| PIL-4                        | 48           | 373             | 1                           | None               | 52               | 8           |
| COP-222                      | 24           | 373             | 0.1                         | None               | 99               | 9           |
| HP-[BZPhIm]Cl-DCX-1          | 24           | 393             | 0.1                         | None               | 91               | 10          |
| PEAMC1                       | 12           | 393             | 0.1                         | None               | 94               | 11          |
| ImIP@TT-COF                  | 48           | 393             | 1                           | None               | 99               | 12          |

|                                 |    |     |     |      |    |           |
|---------------------------------|----|-----|-----|------|----|-----------|
| IP-2                            | 18 | 373 | 0.1 | None | 36 | 13        |
| HNM                             | 36 | 373 | 0.1 | None | 79 | 14        |
| NUP-3                           | 24 | 363 | 0.1 | KI   | 88 | 15        |
| CCTF-350                        | 48 | 393 | 0.4 | None | 79 | 16        |
| Catalyst 5b                     | 3  | 423 | 4   | None | 53 | 17        |
| [HCP-CH <sub>2</sub> -Im][Cl]-1 | 20 | 373 | 0.1 | None | 93 | This work |
| [HCP-CH <sub>2</sub> -Im][Cl]-1 | 8  | 393 | 0.1 | None | 94 | This work |
| [HCP-CH <sub>2</sub> -Im][Cl]-1 | 5  | 403 | 0.1 | None | 93 | This work |
| [HCP-CH <sub>2</sub> -Im][Cl]-1 | 5  | 413 | 0.1 | None | 99 | This work |

## Supplementary Figures

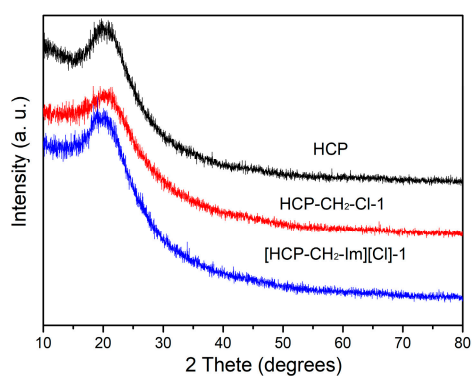

**Fig. S1.** XRD patterns of polymers.

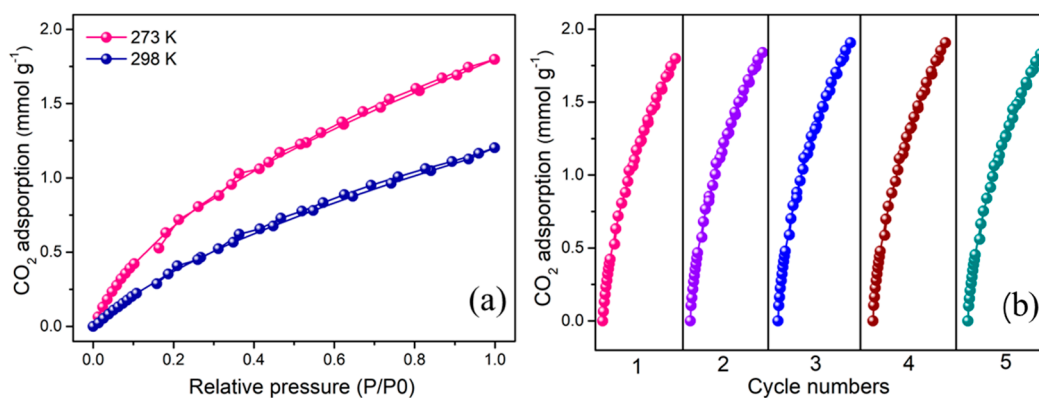

**Fig. S2** (a) CO<sub>2</sub> adsorption isotherms of [HCP-CH<sub>2</sub>-Im][Cl] (1) at 273 K and 298 K, (b) recycling performance of [HCP-CH<sub>2</sub>-Im][Cl] (1) at 273 K

## <sup>1</sup>H NMR spectra of cyclic carbonates

Calculate the yield by using dibromomethane as a standard sample and significant peak is about 4.9 ppm.

**Fig. S3**  $^1\text{H}$  NMR spectra (in  $\text{CDCl}_3$ ) of the reaction mixture using  $[\text{HCP-CH}_2\text{-Im}][\text{Cl}]\text{-1}$  as a catalyst for the cycloaddition reaction of Propylene oxide ( $^1\text{H}$  NMR spectrum was obtained from the crude sample).  $^1\text{H}$  NMR (500 MHz,  $\text{CDCl}_3$ )  $\delta$ : 4.84 (m, 1H), 4.45 (t,  $J = 8.6$  Hz, 1H), 4.54 (t,  $J = 8.0$  Hz, 1H), 4.01 (t,  $J = 7.4$  Hz, 1H), 1.46 (d,  $J = 6.2$  Hz, 3H).

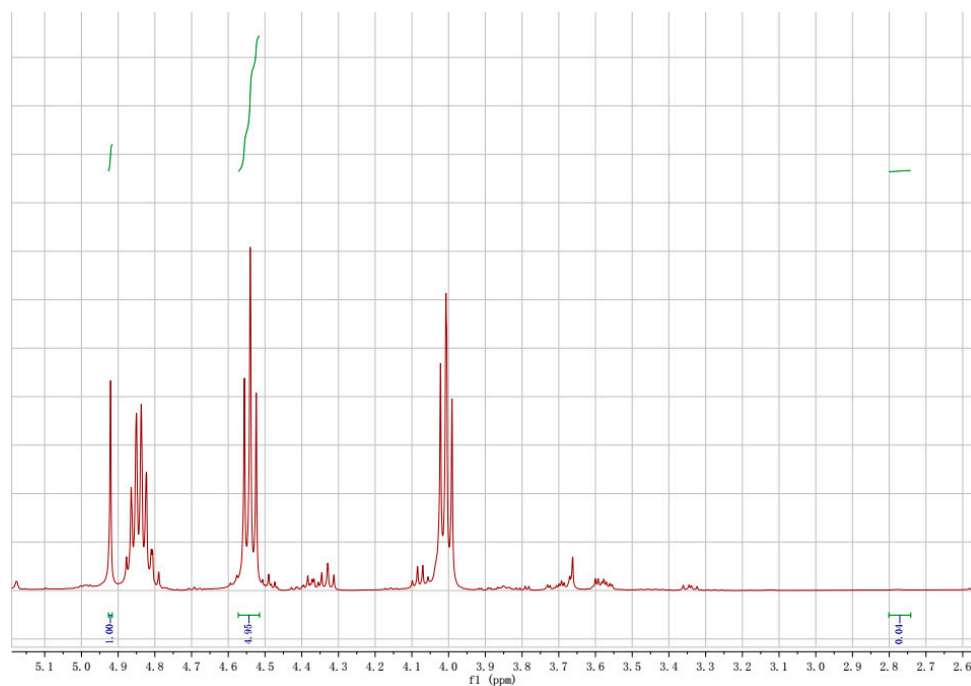

**Fig. S4**  $^1\text{H}$  NMR spectra (in  $\text{CDCl}_3$ ) of the reaction mixture using  $[\text{HCP-CH}_2\text{-Im}][\text{Cl}]\text{-1}$  as a catalyst for the cycloaddition reaction of Epichlorohydrin ( $^1\text{H}$  NMR spectrum was obtained from the crude sample).  $^1\text{H}$  NMR

(500 MHz, CDCl<sub>3</sub>)  $\delta$ : 5.00 (m, 1H), 4.49 (t,  $J$  = 8.6 Hz, 1H), 4.39 (dd,  $J$  = 2.9, 5.9 Hz, 1H), 3.81 (dd,  $J$  = 4.1, 12.4 Hz, 1H), 3.61 (dd,  $J$  = 4.9, 12.2 Hz, 1H).

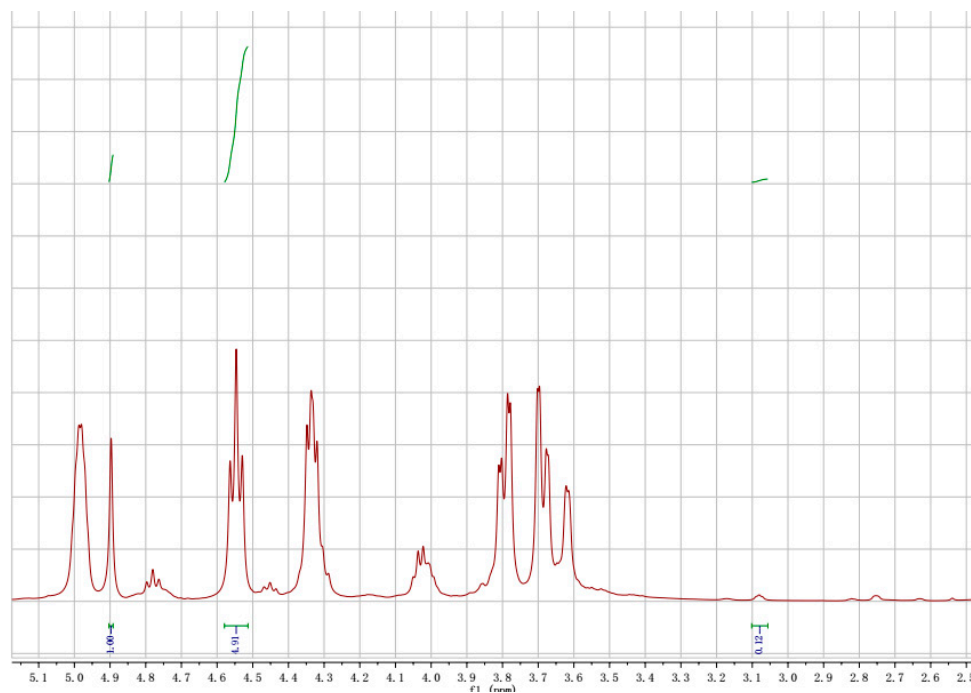

**Fig. S5** <sup>1</sup>H NMR spectra (in CDCl<sub>3</sub>) of the reaction mixture using [HCP-CH<sub>2</sub>-Im][Cl]-1 as a catalyst for the cycloaddition reaction of Epibromohydrin (<sup>1</sup>H NMR spectrum was obtained from the crude sample). <sup>1</sup>H NMR

(500 MHz, CDCl<sub>3</sub>)  $\delta$ : 4.96 (m, 1H), 4.58 (t,  $J$  = 8.6 Hz, 1H), 4.32 (dd,  $J$  = 3.0, 5.8 Hz, 1H), 3.62 (dd,  $J$  = 5.6, 11.3 Hz, 1H), 3.56 (dd,  $J$  = 3.7, 11.4 Hz, 1H).

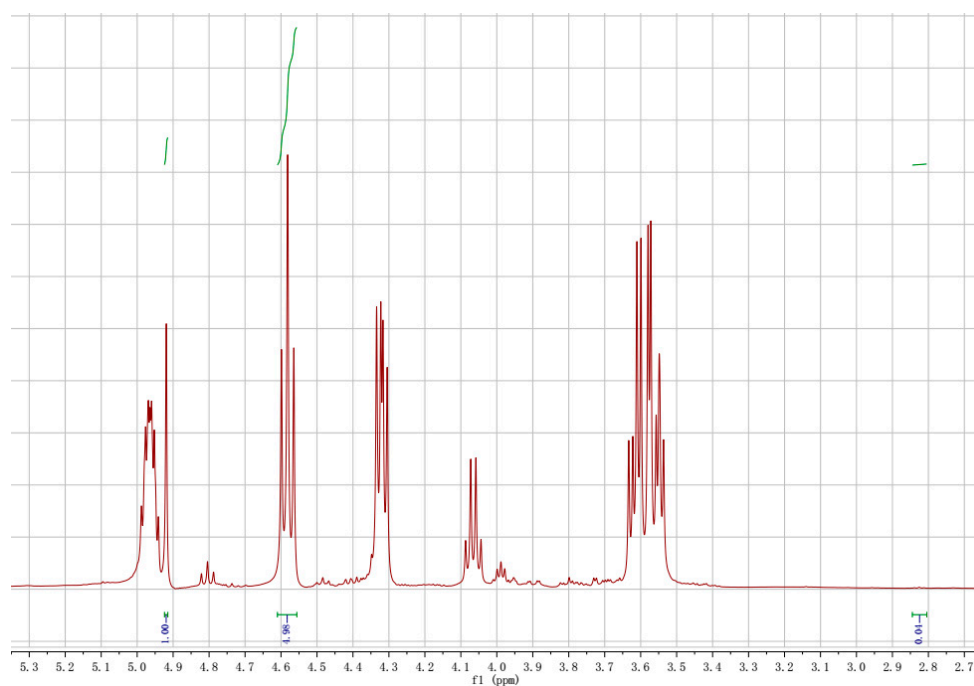

**Fig. S6** <sup>1</sup>H NMR spectra (in CDCl<sub>3</sub>) of the reaction mixture using [HCP-CH<sub>2</sub>-Im][Cl]-1 as a catalyst for the cycloaddition reaction of Styrene oxide (<sup>1</sup>H NMR spectrum was obtained from the crude sample). <sup>1</sup>H NMR

(500 MHz, CDCl<sub>3</sub>)  $\delta$ : 7.41-7.34 (m, Ar-H, 5H), 5.65 (t, J = 8.1 Hz, 1H), 4.77 (t, J = 8.4 Hz, 1H), 4.29 (t, J = 8.3 Hz, 1H).

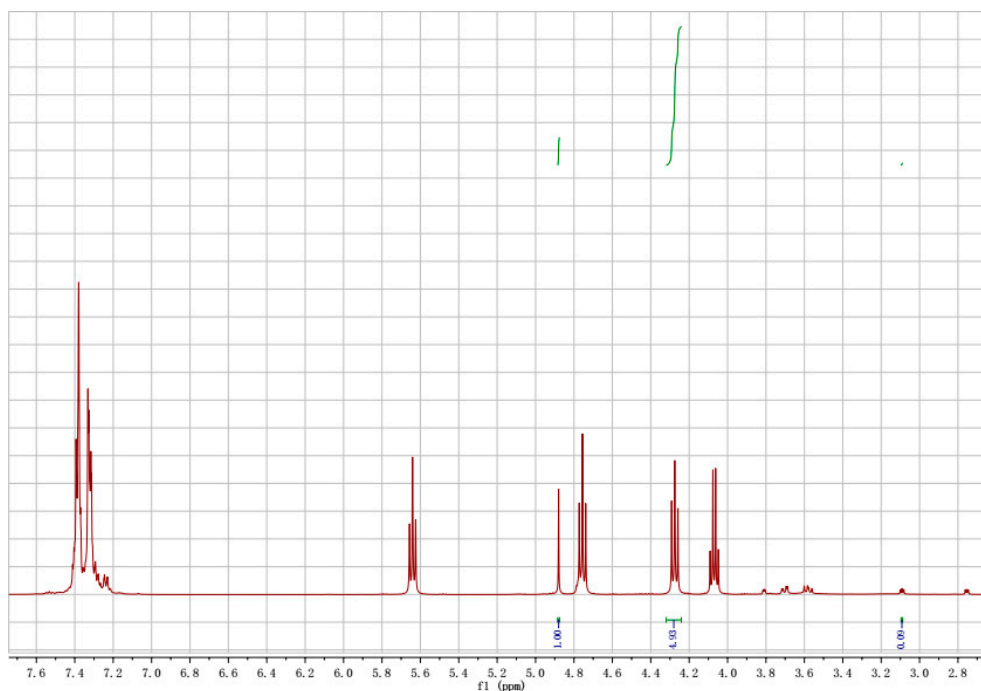

**Fig. S7** <sup>1</sup>H NMR spectra (in CDCl<sub>3</sub>) of the reaction mixture using [HCP-CH<sub>2</sub>-Im][Cl]-1 as a catalyst for the cycloaddition reaction of Allyl glycidyl ether (<sup>1</sup>H NMR spectrum was obtained from the crude sample). <sup>1</sup>H

NMR (500 MHz, CDCl<sub>3</sub>)  $\delta$ : 5.93 (m, 1H), 5.24 (dd,  $J$  = 1.2, 17.3 Hz, 1H), 5.17 (d,  $J$  = 10.4 Hz, 1H), 4.81 (m, 1H), 4.47 (t,  $J$  = 8.4 Hz, 1H), 4.34 (dd,  $J$  = 2.1, 6.0 Hz, 1H), 4.01 (m, 1H), 3.66 (dd,  $J$  = 3.2, 11.2 Hz, 1H), 3.56 (dd,  $J$  = 3.6, 11.1 Hz, 2H).

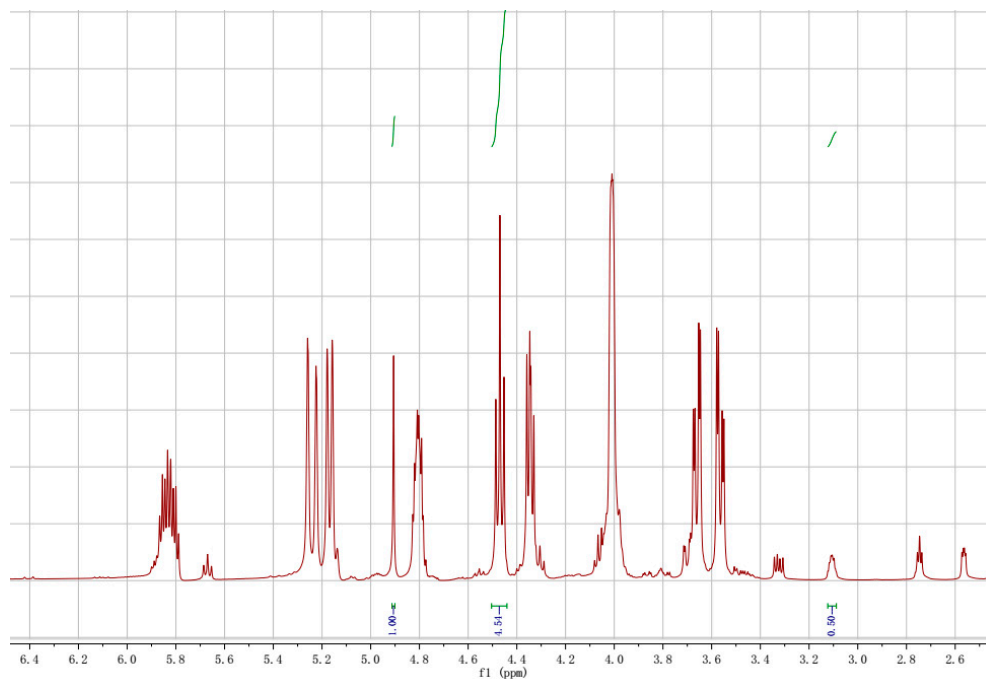

**Fig. S8** <sup>1</sup>H NMR spectra (in CDCl<sub>3</sub>) of the reaction mixture using [HCP-CH<sub>2</sub>-Im][Cl]-1 as a catalyst for the cycloaddition reaction of Butyl glycidyl ether (<sup>1</sup>H NMR spectrum was obtained from the crude sample). <sup>1</sup>H



NMR (500 MHz,  $\text{CDCl}_3$ )  $\delta$ : 4.77 (m, 1H), 4.44 (t,  $J = 8.3$ , 1H), 4.31 (dd,  $J = 2.3$ , 6.0 Hz, 1H), 4.04 (dd,  $J = 7.1$ , 14.3 Hz, 1H), 3.61 (dd,  $J = 3.4$ , 11.4 Hz, 1H), 3.52 (dd,  $J = 3.7$ , 11.2 Hz, 1H), 3.44 (dd,  $J = 1.4$ , 6.5 Hz, 2H), 1.48 (m, 2H), 1.30 (m, 2H), 1.19 (m, 3H).

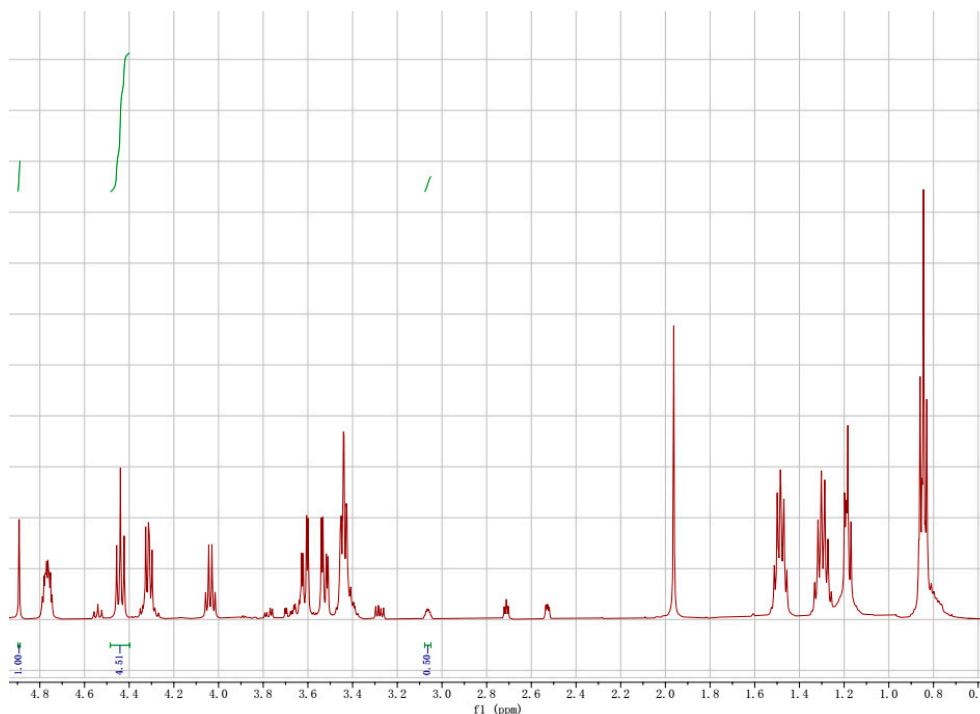

**Fig. S9**  $^1\text{H}$  NMR spectra (in  $\text{CDCl}_3$ ) of the reaction mixture using  $[\text{HCP-CH}_2\text{-Im}][\text{Cl}]\text{-1}$  as a catalyst for the cycloaddition reaction of Glycidyl phenyl ether ( $^1\text{H}$  NMR spectrum was obtained from the recrystallization).

$^1\text{H}$  NMR (500 MHz,  $\text{CDCl}_3$ )  $\delta$ : 7.33 (t,  $J = 8.0$  Hz, 2H), 7.04 (t,  $J = 7.1$  Hz, 1H), 6.94 (d,  $J = 8.1$  Hz, 2H), 5.05 (m, 1H), 4.64 (t,  $J = 8.5$  Hz, 1H), 4.56 (td,  $J = 2.6, 5.9$  Hz, 1H), 4.26 (dd,  $J = 4.2, 10.5$  Hz, 1H), 4.17 (dd,  $J = 3.6, 10.6$  Hz, 1H).

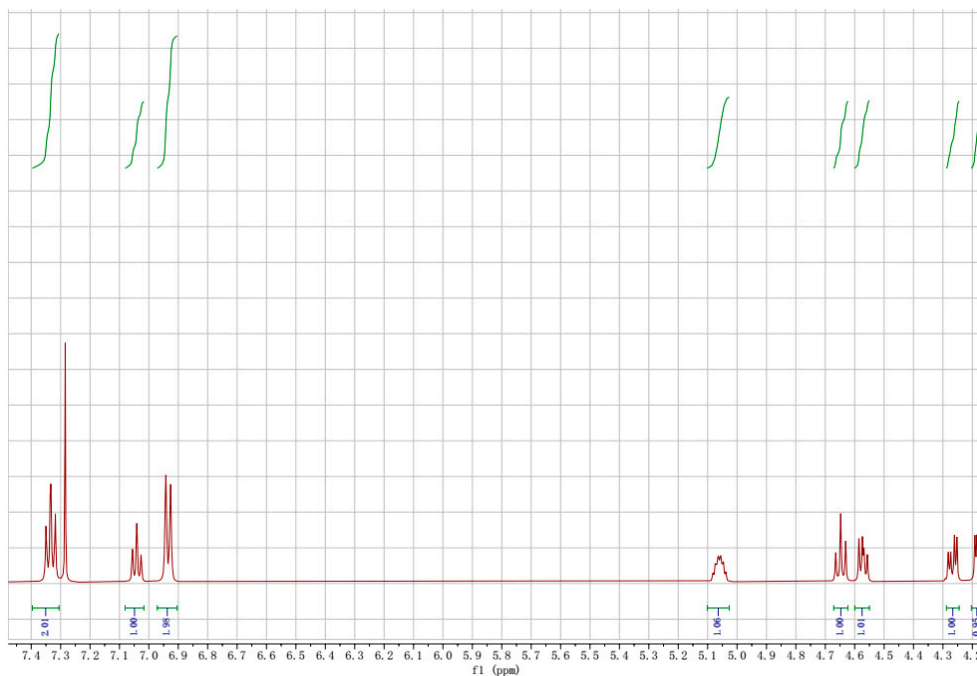

**Fig. S10**  $^1\text{H}$  NMR spectra (in  $\text{CDCl}_3$ ) of the reaction mixture using  $[\text{HCP-CH}_2\text{-Im}][\text{Cl}]\text{-1}$  as a catalyst for the cycloaddition reaction of O-Tolyl glycidyl ether ( $^1\text{H}$  NMR spectrum was obtained from the crude sample).  $^1\text{H}$

NMR (500 MHz, CDCl<sub>3</sub>)  $\delta$ : 7.06 (t,  $J$  = 7.4 Hz, 2H), 6.82 (t,  $J$  = 7.2 Hz, 1H), 6.70 (d,  $J$  = 8.4 Hz, 1H), 4.95 (m, 1H), 4.50 (t,  $J$  = 8.5 Hz, 1H), 4.44 (td,  $J$  = 3.1, 6.7 Hz, 1H), 4.13 (dd,  $J$  = 2.9, 10.8 Hz, 1H), 3.99 (dd,  $J$  = 3.2, 10.7 Hz, 1H), 2.13 (s, 3H).

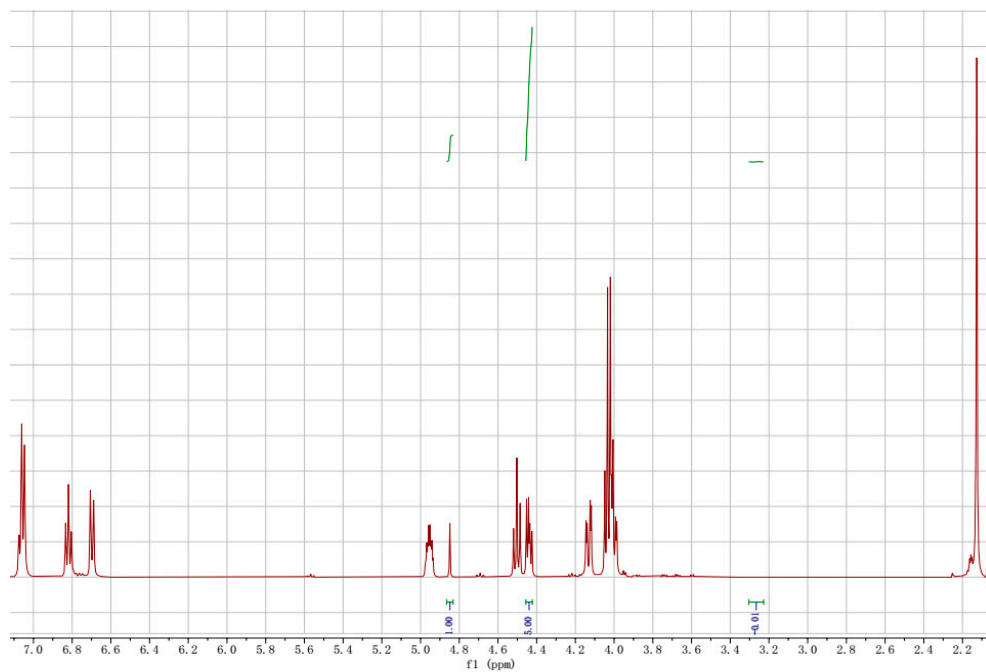

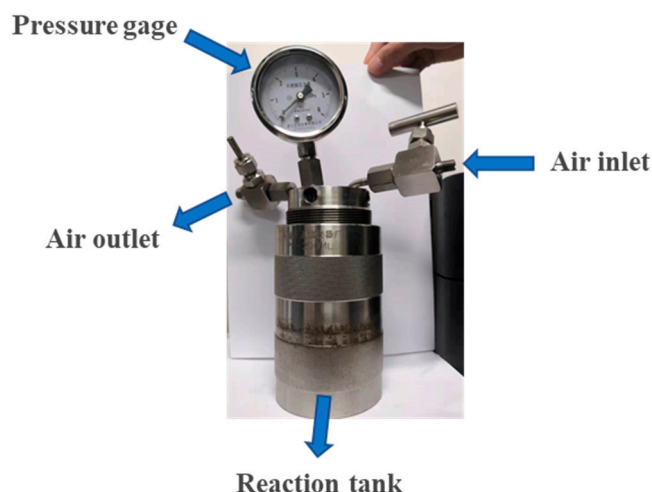

**Fig. S11** The schematic of high-pressure stainless steel autoclave.

## Reference

- [1] Sang, Y.; Huang, J. Benzimidazole-based hyper-cross-linked poly(ionic liquid)s for efficient CO<sub>2</sub> capture and conversion. *Chem. Eng. J.* **2020**, 385, 123973.
- [2] Wang, J.; Sng, W.; Yi, G.; Zhang, Y. Imidazolium salt-modified porous hypercrosslinked polymers for synergistic CO<sub>2</sub> capture and conversion. *Chem. Commun.* **2015**, 51, 12076–12079.
- [3] Wang, X.; Zhou, Y.; Guo, Z.; Chen, G.; Li, J.; Shi, Y.; Liu, Y.; Wang, J. Heterogeneous conversion of CO<sub>2</sub> into cyclic carbonates at ambient pressure catalyzed by ionothermal-derived meso-macroporous hierarchical poly(ionic liquid)s. *Chem. Sci.* **2015**, 6, 6916–6924.
- [4] Lu, Y.; Chang, Z.; Zhang, S.; Wang, S.; Chen, Q.; Feng, L.; Sui, Z. Porous organic polymers containing zinc porphyrin and phosphonium bromide as bifunctional catalysts for conversion of carbon dioxide. *J. Mater. Sci.* **2020**, 55, 11856–11869.
- [5] Zhang, Y.; Luo, N.; Xu, J.; Liu, K.; Zhang, S.; Xu, Q.; Huang, R.; Long, Z.; Tong, M.; Chen, G. Metalated-bipyridine-based [orous hybrid polymers with POSS-derived Si–OH groups for synergistic catalytic CO<sub>2</sub> fixation. *Dalton Trans.* **2020**, 49, 11300–11309.
- [6] Hussain, M.W.; Bhardwaj, V.; Giri, A.; Chande, A.; Patra, A. Multifunctional ionic porous frameworks for CO<sub>2</sub> conversion and combating microbes. *Chem. Sci.* **2020**, 11, 7910–7920.
- [7] Chen, Y.; Luo, R.; Xu, Q.; Jiang, J.; Zhou, X.; Ji, H. Metalloporphyrin polymers with intercalated ionic liquids for synergistic CO<sub>2</sub> fixation via cyclic carbonate production. *ACS Sustainable Chem. Eng.* **2018**, 6, 1074–1082.
- [8] Song, H.; Wang, Y.; Xiao, M.; Liu, L.; Liu, Y.; Liu, X.; Gai, H. Design of novel poly(ionic liquids) for the conversion of CO<sub>2</sub> to cyclic carbonates under mild conditions without solvent. *ACS Sustainable Chem. Eng.* **2019**, 7, 9489–9497.
- [9] Subramanian, S.; Oppenheim, J.; Kim, D.; Nguyen, T.; Silo, W.; Kim, B.; Goddard, W.; Yavuz, C. Catalytic non-redox carbon dioxide fixation in cyclic carbonates. *Chem.* **2019**, 5, 3232–3242.
- [10] Song, H.; Wang, Y.; Liu, Y.; Chen, L.; Feng, B.; Jin, X.; Zhou, Y.; Huang, T.; Xiao, M.; Huang, F.; Gai, H. Conferring poly(ionic liquid)s with high surface areas for enhanced. *ACS Sustainable Chem. Eng.* **2021**, 9, 2115–2128.
- [11] Wang, X.; Dong, Q.; Xu, Z.; Wu, Y.; Gao, D.; Xu, Y.; Ye, C.; Wen, Y.; Liu, A.; Long, Z.; Chen, G. Hierarchically nanoporous copolymer with built-in carbene-CO<sub>2</sub> adducts as halogen-free heterogeneous organocatalyst towards cycloaddition of carbon dioxide into carbonates. *Chem. Eng. J.* **2021**, 403, 126460.
- [12] Zhong, H.; Gao, J.; Sa, R.; Yang, S.; Wu, Z.; Wang, R. Front cover: carbon dioxide conversion upgraded by host-guest cooperation between nitrogen-rich covalent organic framework and imidazolium-based ionic polymer. *ChemSusChem.* **2020**, 13, 6323–6329.
- [13] Zhang, Y.; El-Sayed, E. M.; Su, K.; Yuan, D.; Han, Z. Facile Syntheses of ionic polymers for efficient catalytic conversion of CO<sub>2</sub> to cyclic carbonates. *J. CO<sub>2</sub> Util.* **2020**, 42, 101301.
- [14] Sharma, R.; Muhammad, R.; Srivastava, V.C.; Mohanty, P. Heteroatom driven activation and conversion of CO<sub>2</sub> using cyclophosphazene based inorganic–organic hybrid nanoporous materials. *Sustainable Energy Fuels.* **2021**, 5, 3213–3218.
- [15] Hao, Y.; Yan, X.; Zhu, Z.; Chang, T.; Meng, X.; Fu, X.; Panchal, P.; Kang, L.; Qin, S. Nitrogen-rich covalent organic polymers and potassium iodide for efficient chemical fixation of CO<sub>2</sub> into epoxides under mild conditions. *Sustainable Energy Fuels.* **2021**, 5, 2943–2951.
- [16] Liu, T.; Xu, R.; Yi, J.; Liang, J.; Wang, X.; Shi, P.; Huang, Y.; Cao, R. Imidazolium-based cationic covalent triazine frameworks for highly efficient cycloaddition of carbon dioxide. *ChemCatChem.* **2018**, 10, 2036–2040.
- [17] Calabrese, C.; Liotta, L. F.; Giacalone, F.; Gruttadauria, M.; Aprile, C. Supported polyhedral oligomeric silsesquioxane-based (POSS) materials as highly active organocatalysts for the conversion of CO<sub>2</sub>. *ChemCatChem.* **2019**, 11, 560–567.
